# Supplementary material
Source: publisher figshare collection journal article supplement (https://rs.figshare.com/ndownloader/files/13709084)
Supplement: Supplementary file 1 [file 13709084]

## Sheet: Hoja2
ROW	SPECIES	TIMES TESTED	TIMES POSITIVE	RATIO	SUSCEPTIBILITY
1	Accipiter cooperii	36	23	0.638889	SUSCEPTIBLE
2	Accipiter gentilis	35	25	0.714286	SUSCEPTIBLE
3	Accipiter nisus	14	4	0.285714	SUSCEPTIBLE
4	Accipiter striatus	25	14	0.56	SUSCEPTIBLE
5	Aceros corrugatus	1	0	0	INSUFFICIENT DATA
6	Acridotheres tristis	1	0	0	INSUFFICIENT DATA
7	Acrocephalus arundinaceus	5	0	0	INSUFFICIENT DATA
8	Acrocephalus melanopogon	1	0	0	INSUFFICIENT DATA
9	Acrocephalus paludicola	1	0	0	INSUFFICIENT DATA
10	Acrocephalus palustris	4	2	0.5	SUSCEPTIBLE
11	Acrocephalus schoenobaenus	7	4	0.571429	SUSCEPTIBLE
12	Acrocephalus scirpaceus	13	5	0.384615	SUSCEPTIBLE
13	Acryllium vulturinum	1	0	0	INSUFFICIENT DATA
14	Actitis hypoleucos	2	0	0	INSUFFICIENT DATA
15	Aechmophorus clarkii	3	3	1	SUSCEPTIBLE
16	Aegithalos caudatus	1	0	0	INSUFFICIENT DATA
17	Aegolius acadicus	7	5	0.714286	SUSCEPTIBLE
18	Aegolius funereus	6	3	0.5	SUSCEPTIBLE
19	Aegypius monachus	4	2	0.5	SUSCEPTIBLE
20	Afropavo congensis	1	0	0	INSUFFICIENT DATA
21	Agelaioides badius	1	0	0	INSUFFICIENT DATA
22	Agelaius phoeniceus	40	19	0.475	SUSCEPTIBLE
23	Agelaius tricolor	3	1	0.333333	SUSCEPTIBLE
24	Agelasticus thilius	1	0	0	INSUFFICIENT DATA
25	Aimophila ruficeps	2	1	0.5	SUSCEPTIBLE
26	Aix galericulata	3	1	0.333333	SUSCEPTIBLE
27	Aix sponsa	15	8	0.533333	SUSCEPTIBLE
28	Alca torda	1	0	0	INSUFFICIENT DATA
29	Alcedo atthis	6	2	0.333333	SUSCEPTIBLE
30	Alcedo cristata	1	0	0	INSUFFICIENT DATA
31	Alectoris chukar	4	3	0.75	SUSCEPTIBLE
32	Alectoris graeca	3	1	0.333333	SUSCEPTIBLE
33	Alectoris rufa	2	0	0	INSUFFICIENT DATA
34	Alle alle	1	0	0	INSUFFICIENT DATA
35	Alopochen aegyptiaca	2	1	0.5	SUSCEPTIBLE
36	Amazona albifrons	4	1	0.25	SUSCEPTIBLE
37	Amazona amazonica	1	0	0	INSUFFICIENT DATA
38	Amazona autumnalis	4	1	0.25	SUSCEPTIBLE
39	Amazona farinosa	4	2	0.5	SUSCEPTIBLE
40	Amazona ochrocephala	1	0	0	INSUFFICIENT DATA
41	Amazona viridigenalis	3	2	0.666667	SUSCEPTIBLE
42	Amblycercus holosericeus	2	2	1	SUSCEPTIBLE
43	Ammodramus humeralis	1	0	0	INSUFFICIENT DATA
44	Ammodramus savannarum	1	0	0	INSUFFICIENT DATA
45	Anas acuta	3	1	0.333333	SUSCEPTIBLE
46	Mareca americana	1	0	0	INSUFFICIENT DATA
47	Anas clypeata	3	1	0.333333	SUSCEPTIBLE
48	Anas crecca	5	1	0.2	SUSCEPTIBLE
49	Anas cyanoptera	2	2	1	SUSCEPTIBLE
50	Spatula discors	1	0	0	INSUFFICIENT DATA
51	Anas formosa	3	0	0	INSUFFICIENT DATA
52	Anas fulvigula	2	2	1	SUSCEPTIBLE
53	Anas penelope	3	3	1	SUSCEPTIBLE
54	Anas platyrhynchos	52	21	0.403846	SUSCEPTIBLE
55	Anas poecilorhyncha	6	4	0.666667	SUSCEPTIBLE
56	Anas puna	2	2	1	SUSCEPTIBLE
57	Anas querquedula	1	0	0	INSUFFICIENT DATA
58	Anas strepera	3	0	0	INSUFFICIENT DATA
59	Anas undulata	2	2	1	SUSCEPTIBLE
60	Anous stolidus	1	0	0	INSUFFICIENT DATA
61	Anous tenuirostris	1	0	0	INSUFFICIENT DATA
62	Anser albifrons	6	2	0.333333	SUSCEPTIBLE
63	Anser anser	19	13	0.684211	SUSCEPTIBLE
64	Anser brachyrhynchus	3	0	0	INSUFFICIENT DATA
65	Anser cygnoides	4	2	0.5	SUSCEPTIBLE
66	Anser erythropus	1	0	0	INSUFFICIENT DATA
67	Anser fabalis	2	0	0	INSUFFICIENT DATA
68	Anthus pratensis	1	1	1	SUSCEPTIBLE
69	Anthus trivialis	3	1	0.333333	SUSCEPTIBLE
70	Aphelocoma californica	15	9	0.6	SUSCEPTIBLE
71	Aphelocoma ultramarina	9	9	1	SUSCEPTIBLE
72	Aphelocoma wollweberi	1	1	1	SUSCEPTIBLE
73	Apus apus	9	1	0.111111	SUSCEPTIBLE
74	Aquila adalberti	7	7	1	SUSCEPTIBLE
75	Aquila audax	2	2	1	SUSCEPTIBLE
76	Aquila chrysaetos	10	7	0.7	SUSCEPTIBLE
77	Aquila clanga	2	0	0	INSUFFICIENT DATA
78	Aquila fasciatus	1	1	1	SUSCEPTIBLE
79	Aquila pomarina	2	0	0	INSUFFICIENT DATA
80	Ara ambiguus	1	0	0	INSUFFICIENT DATA
81	Ara ararauna	2	0	0	INSUFFICIENT DATA
82	Ara macao	3	0	0	INSUFFICIENT DATA
83	Ara militaris	2	2	1	SUSCEPTIBLE
84	Aramus guarauna	2	2	1	SUSCEPTIBLE
85	Psittacara acuticaudatus	3	2	0.666667	SUSCEPTIBLE
86	Aratinga nana	4	2	0.5	SUSCEPTIBLE
87	Aratinga solstitialis	1	0	0	INSUFFICIENT DATA
88	Archilochus colubris	6	3	0.5	SUSCEPTIBLE
89	Ardea cinerea	12	1	0.0833333	SUSCEPTIBLE
90	Ardea herodias	11	5	0.454545	SUSCEPTIBLE
91	Ardea purpurea	1	0	0	INSUFFICIENT DATA
92	Ardeola grayii	1	1	1	SUSCEPTIBLE
93	Ardeola ralloides	1	0	0	INSUFFICIENT DATA
94	Arenaria interpres	3	3	1	SUSCEPTIBLE
95	Arremonops rufivirgatus	4	3	0.75	SUSCEPTIBLE
96	Asio flammeus	5	3	0.6	SUSCEPTIBLE
97	Asio otus	23	5	0.217391	SUSCEPTIBLE
98	Asio stygius	1	0	0	INSUFFICIENT DATA
99	Asthenes baeri	1	0	0	INSUFFICIENT DATA
100	Athene cunicularia	7	3	0.428571	SUSCEPTIBLE
101	Athene noctua	11	3	0.272727	SUSCEPTIBLE
102	Attila spadiceus	1	0	0	INSUFFICIENT DATA
103	Auriparus flaviceps	3	1	0.333333	SUSCEPTIBLE
104	Aythya affinis	3	3	1	SUSCEPTIBLE
105	Aythya americana	1	0	0	INSUFFICIENT DATA
106	Aythya collaris	2	1	0.5	SUSCEPTIBLE
107	Aythya ferina	2	0	0	INSUFFICIENT DATA
108	Aythya fuligula	1	0	0	INSUFFICIENT DATA
109	Aythya marila	3	2	0.666667	SUSCEPTIBLE
110	Aythya nyroca	2	0	0	INSUFFICIENT DATA
111	Aythya valisineria	2	2	1	SUSCEPTIBLE
112	Baeolophus bicolor	27	13	0.481481	SUSCEPTIBLE
113	Baeolophus inornatus	3	2	0.666667	SUSCEPTIBLE
114	Balearica pavonina	1	1	1	SUSCEPTIBLE
115	Bombycilla cedrorum	17	9	0.529412	SUSCEPTIBLE
116	Bombycilla garrulus	1	0	0	INSUFFICIENT DATA
117	Bonasa umbellus	6	4	0.666667	SUSCEPTIBLE
118	Botaurus stellaris	3	0	0	INSUFFICIENT DATA
119	Branta canadensis	30	19	0.633333	SUSCEPTIBLE
120	Branta hutchinsii	1	1	1	SUSCEPTIBLE
121	Branta leucopsis	1	1	1	SUSCEPTIBLE
122	Branta ruficollis	2	2	1	SUSCEPTIBLE
123	Branta sandvicensis	3	2	0.666667	SUSCEPTIBLE
124	Brotogeris versicolurus	2	2	1	SUSCEPTIBLE
125	Bubo bubo	5	1	0.2	SUSCEPTIBLE
126	Bubo lacteus	2	2	1	SUSCEPTIBLE
127	Bubo scandiacus	9	8	0.888889	SUSCEPTIBLE
128	Bubo virginianus	28	17	0.607143	SUSCEPTIBLE
129	Bubulcus ibis	11	7	0.636364	SUSCEPTIBLE
130	Bucephala albeola	2	2	1	SUSCEPTIBLE
131	Bucephala clangula	2	2	1	SUSCEPTIBLE
132	Buceros bicornis	1	0	0	INSUFFICIENT DATA
133	Bucorvus abyssinicus	1	1	1	SUSCEPTIBLE
134	Burhinus oedicnemus	2	1	0.5	SUSCEPTIBLE
135	Buteo albicaudatus	2	1	0.5	SUSCEPTIBLE
136	Buteo brachyurus	1	0	0	INSUFFICIENT DATA
137	Buteo buteo	18	7	0.388889	SUSCEPTIBLE
138	Buteo jamaicensis	36	28	0.777778	SUSCEPTIBLE
139	Buteo lagopus	5	3	0.6	SUSCEPTIBLE
140	Buteo lineatus	17	11	0.647059	SUSCEPTIBLE
141	Buteo magnirostris	2	0	0	INSUFFICIENT DATA
142	Buteo nitidus	1	0	0	INSUFFICIENT DATA
143	Buteo platypterus	7	7	1	SUSCEPTIBLE
144	Buteo regalis	8	5	0.625	SUSCEPTIBLE
145	Buteo swainsoni	11	7	0.636364	SUSCEPTIBLE
146	Buteogallus anthracinus	2	1	0.5	SUSCEPTIBLE
147	Buteogallus meridionalis	1	0	0	INSUFFICIENT DATA
148	Butorides_virescens	1	0	0	INSUFFICIENT DATA
149	Butorides virescens	8	8	1	SUSCEPTIBLE
150	Cacatua galerita	3	0	0	INSUFFICIENT DATA
151	Cairina moschata	11	5	0.454545	SUSCEPTIBLE
152	Calamospiza melanocorys	2	0	0	INSUFFICIENT DATA
153	Calidris alpina	4	0	0	INSUFFICIENT DATA
154	Calidris canutus	1	0	0	INSUFFICIENT DATA
155	Calidris mauri	3	3	1	SUSCEPTIBLE
156	Calidris minuta	2	0	0	INSUFFICIENT DATA
157	Callipepla californica	13	8	0.615385	SUSCEPTIBLE
158	Callipepla gambelii	2	0	0	INSUFFICIENT DATA
159	Caloenas nicobarica	1	0	0	INSUFFICIENT DATA
160	Calonectris leucomelas	1	0	0	INSUFFICIENT DATA
161	Calypte anna	7	3	0.428571	SUSCEPTIBLE
162	Calypte costae	1	1	1	SUSCEPTIBLE
163	Camaroptera brachyura	1	0	0	INSUFFICIENT DATA
164	Campethera nubica	1	1	1	SUSCEPTIBLE
165	Campylorhynchus brunneicapillus	4	2	0.5	SUSCEPTIBLE
166	Campylorhynchus yucatanicus	1	1	1	SUSCEPTIBLE
167	Caprimulgus climacurus	1	0	0	INSUFFICIENT DATA
168	Caprimulgus europaeus	2	0	0	INSUFFICIENT DATA
169	Caprimulgus indicus	1	0	0	INSUFFICIENT DATA
170	Caprimulgus ruficollis	1	1	1	SUSCEPTIBLE
171	Caprimulgus vociferus	1	1	1	SUSCEPTIBLE
172	Caracara cheriway	2	2	1	SUSCEPTIBLE
173	Caracara plancus	2	1	0.5	SUSCEPTIBLE
174	Cardellina rubrifrons	1	0	0	INSUFFICIENT DATA
175	Cardinalis cardinalis	59	46	0.779661	SUSCEPTIBLE
176	Cardinalis sinuatus	2	2	1	SUSCEPTIBLE
177	Linaria cannabina	2	1	0.5	SUSCEPTIBLE
178	Carduelis carduelis	8	2	0.25	SUSCEPTIBLE
179	Chloris chloris	9	1	0.111111	SUSCEPTIBLE
180	Spinus magellanicus	1	0	0	INSUFFICIENT DATA
181	Spinus spinus	7	4	0.571429	SUSCEPTIBLE
182	Spinus psaltria	11	5	0.454545	SUSCEPTIBLE
183	Spinus spinus	5	1	0.2	SUSCEPTIBLE
184	Spinus tristis	25	10	0.4	SUSCEPTIBLE
185	Carpodacus cassinii	2	2	1	SUSCEPTIBLE
186	Carpodacus erythrinus	1	1	1	SUSCEPTIBLE
187	Haemorhous mexicanus	62	39	0.629032	SUSCEPTIBLE
188	Haemorhous purpureus	6	4	0.666667	SUSCEPTIBLE
189	Casmerodius albus	7	3	0.428571	SUSCEPTIBLE
190	Cathartes aura	12	6	0.5	SUSCEPTIBLE
191	Catharus bicknelli	1	0	0	INSUFFICIENT DATA
192	Catharus fuscescens	5	3	0.6	SUSCEPTIBLE
193	Catharus guttatus	23	7	0.304348	SUSCEPTIBLE
194	Catharus minimus	4	3	0.75	SUSCEPTIBLE
195	Catharus swainsoni	1	0	0	INSUFFICIENT DATA
196	Catharus ustulatus	22	12	0.545455	SUSCEPTIBLE
197	Catoptrophorus semipalmatus	1	0	0	INSUFFICIENT DATA
198	Centrocercus urophasianus	9	8	0.888889	SUSCEPTIBLE
199	Cercotrichas podobe	1	1	1	SUSCEPTIBLE
200	Certhia americana	1	0	0	INSUFFICIENT DATA
201	Certhia brachydactyla	2	0	0	INSUFFICIENT DATA
202	Cettia cetti	2	0	0	INSUFFICIENT DATA
203	Chaetura pelagica	2	2	1	SUSCEPTIBLE
204	Chalcopsitta cardinalis	1	0	0	INSUFFICIENT DATA
205	Charadrius hiaticula	1	0	0	INSUFFICIENT DATA
206	Charadrius melodus	2	2	1	SUSCEPTIBLE
207	Charadrius vociferus	5	3	0.6	SUSCEPTIBLE
208	Chen caerulescens	4	4	1	SUSCEPTIBLE
209	Chen canagica	2	2	1	SUSCEPTIBLE
210	Chloephaga melanoptera	1	1	1	SUSCEPTIBLE
211	Chloroceryle aenea	1	1	1	SUSCEPTIBLE
212	Chondestes grammacus	7	2	0.285714	SUSCEPTIBLE
213	Chordeiles acutipennis	8	4	0.5	SUSCEPTIBLE
214	Chordeiles minor	5	4	0.8	SUSCEPTIBLE
215	Chrysolophus amherstiae	1	0	0	INSUFFICIENT DATA
216	Chrysolophus pictus	2	1	0.5	SUSCEPTIBLE
217	Chrysomus ruficapillus	2	0	0	INSUFFICIENT DATA
218	Ciconia boyciana	1	0	0	INSUFFICIENT DATA
219	Ciconia ciconia	29	22	0.758621	SUSCEPTIBLE
220	Ciconia nigra	1	0	0	INSUFFICIENT DATA
221	Cinclus mexicanus	2	2	1	SUSCEPTIBLE
222	Circaetus gallicus	2	2	1	SUSCEPTIBLE
223	Circus aeruginosus	7	2	0.285714	SUSCEPTIBLE
224	Circus cyaneus	4	3	0.75	SUSCEPTIBLE
225	Circus pygargus	2	1	0.5	SUSCEPTIBLE
226	Cisticola juncidis	1	0	0	INSUFFICIENT DATA
227	Cistothorus palustris	4	1	0.25	SUSCEPTIBLE
228	Clamator glandarius	1	1	1	SUSCEPTIBLE
229	Coccothraustes coccothraustes	4	1	0.25	SUSCEPTIBLE
230	Hesperiphona vespertina	2	2	1	SUSCEPTIBLE
231	Coccyzus americanus	6	5	0.833333	SUSCEPTIBLE
232	Coccyzus erythropthalmus	1	0	0	INSUFFICIENT DATA
233	Coccyzus longirostris	2	2	1	SUSCEPTIBLE
234	Coccyzus melacoryphus	1	0	0	INSUFFICIENT DATA
235	Coccyzus minor	1	1	1	SUSCEPTIBLE
236	Coereba flaveola	4	3	0.75	SUSCEPTIBLE
237	Colaptes auratus	20	6	0.3	SUSCEPTIBLE
238	Colaptes melanochloros	1	0	0	INSUFFICIENT DATA
239	Colinus virginianus	5	3	0.6	SUSCEPTIBLE
240	Columba guinea	1	0	0	INSUFFICIENT DATA
241	Columba livia	76	47	0.618421	SUSCEPTIBLE
242	Columba palumbus	5	2	0.4	SUSCEPTIBLE
243	Columba rupestris	1	0	0	INSUFFICIENT DATA
244	Columbina inca	3	3	1	SUSCEPTIBLE
245	Columbina minuta	1	1	1	SUSCEPTIBLE
246	Columbina passerina	22	12	0.545455	SUSCEPTIBLE
247	Columbina picui	1	0	0	INSUFFICIENT DATA
248	Columbina talpacoti	5	5	1	SUSCEPTIBLE
249	Contopus cooperi	4	2	0.5	SUSCEPTIBLE
250	Contopus sordidulus	3	0	0	INSUFFICIENT DATA
251	Contopus virens	10	1	0.1	SUSCEPTIBLE
252	Coracias abyssinicus	1	0	0	INSUFFICIENT DATA
253	Coracias garrulus	1	0	0	INSUFFICIENT DATA
254	Coragyps atratus	7	5	0.714286	SUSCEPTIBLE
255	Corvus brachyrhynchos	55	52	0.945455	SUSCEPTIBLE
256	Corvus caurinus	3	0	0	INSUFFICIENT DATA
257	Corvus corax	34	14	0.411765	SUSCEPTIBLE
258	Corvus cornix	13	5	0.384615	SUSCEPTIBLE
259	Corvus corone	20	13	0.65	SUSCEPTIBLE
260	Corvus cryptoleucus	3	3	1	SUSCEPTIBLE
261	Corvus frugilegus	8	1	0.125	SUSCEPTIBLE
262	Corvus macrorhynchos	1	0	0	INSUFFICIENT DATA
263	Corvus monedula	10	1	0.1	SUSCEPTIBLE
264	Corvus ossifragus	12	11	0.916667	SUSCEPTIBLE
265	Coryphospingus cucullatus	1	0	0	INSUFFICIENT DATA
266	Lamprotornis regius	1	1	1	SUSCEPTIBLE
267	Synoicus chinensis	2	0	0	INSUFFICIENT DATA
268	Coturnix coturnix	3	0	0	INSUFFICIENT DATA
269	Coturnix japonica	1	0	0	INSUFFICIENT DATA
270	Crax rubra	3	1	0.333333	SUSCEPTIBLE
271	Crossoptilon auritum	2	2	1	SUSCEPTIBLE
272	Crotophaga sulcirostris	3	2	0.666667	SUSCEPTIBLE
273	Cuculus canorus	7	0	0	INSUFFICIENT DATA
274	Cuculus saturatus	1	0	0	INSUFFICIENT DATA
275	Cyanochen cyanoptera	3	3	1	SUSCEPTIBLE
276	Cyanocitta cristata	48	33	0.6875	SUSCEPTIBLE
277	Cyanocitta stelleri	8	6	0.75	SUSCEPTIBLE
278	Cyanocompsa parellina	1	1	1	SUSCEPTIBLE
279	Cyanocorax yncas	4	0	0	INSUFFICIENT DATA
280	Cyanopica cyanus	2	0	0	INSUFFICIENT DATA
281	Cyanoptila cyanomelana	1	0	0	INSUFFICIENT DATA
282	Cyclarhis gujanensis	3	1	0.333333	SUSCEPTIBLE
283	Cygnus atratus	3	0	0	INSUFFICIENT DATA
284	Cygnus buccinator	2	1	0.5	SUSCEPTIBLE
285	Cygnus columbianus	3	3	1	SUSCEPTIBLE
286	Cygnus cygnus	5	1	0.2	SUSCEPTIBLE
287	Cygnus olor	13	9	0.692308	SUSCEPTIBLE
288	Delichon urbicum	7	3	0.428571	SUSCEPTIBLE
289	Picoides kizuki	1	0	0	INSUFFICIENT DATA
290	Dendrocopos major	7	1	0.142857	SUSCEPTIBLE
291	Dendrocopos syriacus	1	0	0	INSUFFICIENT DATA
292	Dendrocygna autumnalis	5	3	0.6	SUSCEPTIBLE
293	Dendrocygna bicolor	1	1	1	SUSCEPTIBLE
294	Setophaga caerulescens	6	4	0.666667	SUSCEPTIBLE
295	Setophaga castanea	1	0	0	INSUFFICIENT DATA
296	Setophaga coronata	21	8	0.380952	SUSCEPTIBLE
297	Setophaga discolor	4	2	0.5	SUSCEPTIBLE
298	Setophaga dominica	1	0	0	INSUFFICIENT DATA
299	Setophaga fusca	4	2	0.5	SUSCEPTIBLE
300	Setophaga magnolia	8	5	0.625	SUSCEPTIBLE
301	Setophaga nigrescens	2	2	1	SUSCEPTIBLE
302	Setophaga occidentalis	1	0	0	INSUFFICIENT DATA
303	Setophaga palmarum	2	1	0.5	SUSCEPTIBLE
304	Setophaga pensylvanica	1	0	0	INSUFFICIENT DATA
305	Setophaga petechia	14	7	0.5	SUSCEPTIBLE
306	Setophaga pinus	2	0	0	INSUFFICIENT DATA
307	Setophaga striata	4	2	0.5	SUSCEPTIBLE
308	Setophaga townsendi	7	3	0.428571	SUSCEPTIBLE
309	Setophaga virens	3	0	0	INSUFFICIENT DATA
310	Dinemellia dinemelli	1	1	1	SUSCEPTIBLE
311	Dives dives	5	5	1	SUSCEPTIBLE
312	Dolichonyx oryzivorus	3	3	1	SUSCEPTIBLE
313	Dromaius novaehollandiae	4	2	0.5	SUSCEPTIBLE
314	Dryocopus martius	2	0	0	INSUFFICIENT DATA
315	Hylatomus pileatus	2	1	0.5	SUSCEPTIBLE
316	Ducula bicolor	1	0	0	INSUFFICIENT DATA
317	Dumetella carolinensis	46	29	0.630435	SUSCEPTIBLE
318	Eclectus roratus	1	0	0	INSUFFICIENT DATA
319	Ectopistes migratorius	1	0	0	INSUFFICIENT DATA
320	Egretta caerulea	4	2	0.5	SUSCEPTIBLE
321	Egretta garzetta	6	0	0	INSUFFICIENT DATA
322	Egretta thula	4	3	0.75	SUSCEPTIBLE
323	Egretta tricolor	1	1	1	SUSCEPTIBLE
324	Elaenia martinica	1	0	0	INSUFFICIENT DATA
325	Elanoides forficatus	3	2	0.666667	SUSCEPTIBLE
326	Elanus leucurus	1	1	1	SUSCEPTIBLE
327	Emberiza citrinella	1	0	0	INSUFFICIENT DATA
328	Emberiza hortulana	1	0	0	INSUFFICIENT DATA
329	Emberiza rustica	1	0	0	INSUFFICIENT DATA
330	Emberiza schoeniclus	7	3	0.428571	SUSCEPTIBLE
331	Embernagra platensis	1	0	0	INSUFFICIENT DATA
332	Empidonax difficilis	7	3	0.428571	SUSCEPTIBLE
333	Empidonax flaviventris	1	0	0	INSUFFICIENT DATA
334	Empidonax hammondii	3	2	0.666667	SUSCEPTIBLE
335	Empidonax minimus	6	2	0.333333	SUSCEPTIBLE
336	Empidonax oberholseri	1	0	0	INSUFFICIENT DATA
337	Empidonax traillii	5	3	0.6	SUSCEPTIBLE
338	Empidonax virescens	1	0	0	INSUFFICIENT DATA
339	Eos bornea	2	2	1	SUSCEPTIBLE
340	Eos reticulata	2	2	1	SUSCEPTIBLE
341	Eos squamata	2	2	1	SUSCEPTIBLE
342	Ephippiorhynchus senegalensis	1	1	1	SUSCEPTIBLE
343	Epimachus meyeri	1	0	0	INSUFFICIENT DATA
344	Erithacus rubecula	15	6	0.4	SUSCEPTIBLE
345	Cercotrichas galactotes	1	1	1	SUSCEPTIBLE
346	Chloebia gouldiae	4	2	0.5	SUSCEPTIBLE
347	Erythrura psittacea	1	0	0	INSUFFICIENT DATA
348	Eucometis penicillata	2	1	0.5	SUSCEPTIBLE
349	Eudocimus ruber	3	2	0.666667	SUSCEPTIBLE
350	Eudromia elegans	3	2	0.666667	SUSCEPTIBLE
351	Eumomota superciliosa	1	1	1	SUSCEPTIBLE
352	Euphagus carolinus	3	2	0.666667	SUSCEPTIBLE
353	Euphagus cyanocephalus	18	9	0.5	SUSCEPTIBLE
354	Euphonia affinis	1	1	1	SUSCEPTIBLE
355	Euphonia hirundinacea	1	1	1	SUSCEPTIBLE
356	Eurystomus orientalis	1	0	0	INSUFFICIENT DATA
357	Falco columbarius	15	11	0.733333	SUSCEPTIBLE
358	Falco eleonorae	1	1	1	SUSCEPTIBLE
359	Falco femoralis	1	0	0	INSUFFICIENT DATA
360	Falco mexicanus	5	4	0.8	SUSCEPTIBLE
361	Falco naumanni	3	1	0.333333	SUSCEPTIBLE
362	Falco peregrinus	16	7	0.4375	SUSCEPTIBLE
363	Falco rufigularis	1	0	0	INSUFFICIENT DATA
364	Falco rusticolus	5	4	0.8	SUSCEPTIBLE
365	Falco sparverius	33	23	0.69697	SUSCEPTIBLE
366	Falco subbuteo	6	2	0.333333	SUSCEPTIBLE
367	Falco tinnunculus	18	6	0.333333	SUSCEPTIBLE
368	Ficedula hypoleuca	7	2	0.285714	SUSCEPTIBLE
369	Forpus coelestis	3	2	0.666667	SUSCEPTIBLE
370	Pternistis erckelii	1	0	0	INSUFFICIENT DATA
371	Fratercula arctica	1	0	0	INSUFFICIENT DATA
372	Fregata minor	1	1	1	SUSCEPTIBLE
373	Fringilla coelebs	12	5	0.416667	SUSCEPTIBLE
374	Fulica americana	12	6	0.5	SUSCEPTIBLE
375	Fulica atra	19	14	0.736842	SUSCEPTIBLE
376	Fulmarus glacialis	1	0	0	INSUFFICIENT DATA
377	Furnarius rufus	1	1	1	SUSCEPTIBLE
378	Galerida cristata	4	0	0	INSUFFICIENT DATA
379	Gallicolumba luzonica	2	2	1	SUSCEPTIBLE
380	Gallinago delicata	1	0	0	INSUFFICIENT DATA
381	Gallinago gallinago	1	0	0	INSUFFICIENT DATA
382	Gallinula chloropus	3	0	0	INSUFFICIENT DATA
383	Hypotaenidia owstoni	1	0	0	INSUFFICIENT DATA
384	Gallus gallus	31	27	0.870968	SUSCEPTIBLE
385	Gallus varius	2	2	1	SUSCEPTIBLE
386	Garrulax leucolophus	2	2	1	SUSCEPTIBLE
387	Garrulus glandarius	23	11	0.478261	SUSCEPTIBLE
388	Gavia immer	3	2	0.666667	SUSCEPTIBLE
389	Gavia stellata	1	0	0	INSUFFICIENT DATA
390	Geococcyx californianus	1	1	1	SUSCEPTIBLE
391	Geopelia striata	1	0	0	INSUFFICIENT DATA
392	Geothlypis aequinoctialis	1	0	0	INSUFFICIENT DATA
393	Geothlypis poliocephala	3	0	0	INSUFFICIENT DATA
394	Geothlypis trichas	21	9	0.428571	SUSCEPTIBLE
395	Geotrygon montana	1	1	1	SUSCEPTIBLE
396	Geranoaetus melanoleucus	1	0	0	INSUFFICIENT DATA
397	Geronticus eremita	2	2	1	SUSCEPTIBLE
398	Glaucidium brasilianum	5	4	0.8	SUSCEPTIBLE
399	Glaucidium gnoma	2	1	0.5	SUSCEPTIBLE
400	Grus americana	3	2	0.666667	SUSCEPTIBLE
401	Antigone canadensis	3	2	0.666667	SUSCEPTIBLE
402	Grus carunculatus	1	1	1	SUSCEPTIBLE
403	Grus grus	2	0	0	INSUFFICIENT DATA
404	Grus japonensis	3	3	1	SUSCEPTIBLE
405	Leucogeranus leucogeranus	1	1	1	SUSCEPTIBLE
406	Grus monacha	2	2	1	SUSCEPTIBLE
407	Grus nigricollis	2	1	0.5	SUSCEPTIBLE
408	Antigone vipio	2	2	1	SUSCEPTIBLE
409	Anthropoides virgo	1	1	1	SUSCEPTIBLE
410	Guttera pucherani	2	2	1	SUSCEPTIBLE
411	Gymnogyps californianus	5	5	1	SUSCEPTIBLE
412	Gymnorhinus cyanocephalus	2	2	1	SUSCEPTIBLE
413	Gypaetus barbatus	3	2	0.666667	SUSCEPTIBLE
414	Gyps fulvus	3	0	0	INSUFFICIENT DATA
415	Habia fuscicauda	2	2	1	SUSCEPTIBLE
416	Haematopus palliatus	2	0	0	INSUFFICIENT DATA
417	Halcyon leucocephala	2	1	0.5	SUSCEPTIBLE
418	Halcyon pileata	1	0	0	INSUFFICIENT DATA
419	Halcyon senegalensis	1	0	0	INSUFFICIENT DATA
420	Haliaeetus albicilla	5	2	0.4	SUSCEPTIBLE
421	Haliaeetus leucocephalus	11	6	0.545455	SUSCEPTIBLE
422	Buteogallus coronatus	1	1	1	SUSCEPTIBLE
423	Buteogallus solitarius	1	1	1	SUSCEPTIBLE
424	Helmitheros vermivorum	2	0	0	INSUFFICIENT DATA
425	Hieraaetus pennatus	3	2	0.666667	SUSCEPTIBLE
426	Himantopus himantopus	1	0	0	INSUFFICIENT DATA
427	Hippolais icterina	2	0	0	INSUFFICIENT DATA
428	Iduna opaca	1	1	1	SUSCEPTIBLE
429	Iduna pallida	1	0	0	INSUFFICIENT DATA
430	Hippolais polyglotta	5	0	0	INSUFFICIENT DATA
431	Hirundo rustica	26	9	0.346154	SUSCEPTIBLE
432	Histrionicus histrionicus	1	1	1	SUSCEPTIBLE
433	Catharus mustelinus	16	9	0.5625	SUSCEPTIBLE
434	Icteria virens	14	5	0.357143	SUSCEPTIBLE
435	Icterus auratus	1	1	1	SUSCEPTIBLE
436	Icterus bullockiorum	14	4	0.285714	SUSCEPTIBLE
437	Icterus cucullatus	10	5	0.5	SUSCEPTIBLE
438	Icterus galbula	7	4	0.571429	SUSCEPTIBLE
439	Icterus gularis	4	2	0.5	SUSCEPTIBLE
440	Icterus leucopteryx	2	1	0.5	SUSCEPTIBLE
441	Icterus pectoralis	1	1	1	SUSCEPTIBLE
442	Icterus spurius	11	4	0.363636	SUSCEPTIBLE
443	Ictinia mississippiensis	2	2	1	SUSCEPTIBLE
444	Ictinia plumbea	1	0	0	INSUFFICIENT DATA
445	Irena puella	1	0	0	INSUFFICIENT DATA
446	Ixobrychus exilis	3	3	1	SUSCEPTIBLE
447	Ixobrychus minutus	2	0	0	INSUFFICIENT DATA
448	Hypsipetes amaurotis	1	0	0	INSUFFICIENT DATA
449	Junco hyemalis	14	4	0.285714	SUSCEPTIBLE
450	Jynx torquilla	1	1	1	SUSCEPTIBLE
451	Knipolegus aterrimus	1	0	0	INSUFFICIENT DATA
452	Knipolegus striaticeps	1	0	0	INSUFFICIENT DATA
453	Lamprotornis caudatus	1	0	0	INSUFFICIENT DATA
454	Lamprotornis pulcher	1	0	0	INSUFFICIENT DATA
455	Lamprotornis purpuroptera	1	1	1	SUSCEPTIBLE
456	Lamprotornis superbus	1	0	0	INSUFFICIENT DATA
457	Laniarius barbarus	1	1	1	SUSCEPTIBLE
458	Lanius collurio	5	2	0.4	SUSCEPTIBLE
459	Lanius excubitor	1	1	1	SUSCEPTIBLE
460	Lanius ludovicianus	18	12	0.666667	SUSCEPTIBLE
461	Lanius senator	4	3	0.75	SUSCEPTIBLE
462	Larosterna inca	3	3	1	SUSCEPTIBLE
463	Larus argentatus	12	5	0.416667	SUSCEPTIBLE
464	Larus atricilla	7	6	0.857143	SUSCEPTIBLE
465	Larus audouinii	1	0	0	INSUFFICIENT DATA
466	Larus cachinnans	3	2	0.666667	SUSCEPTIBLE
467	Larus californicus	3	3	1	SUSCEPTIBLE
468	Larus canus	1	0	0	INSUFFICIENT DATA
469	Larus cirrocephalus	1	0	0	INSUFFICIENT DATA
470	Larus crassirostris	2	1	0.5	SUSCEPTIBLE
471	Larus delawarensis	13	7	0.538462	SUSCEPTIBLE
472	Larus fuscus	1	1	1	SUSCEPTIBLE
473	Larus genei	3	1	0.333333	SUSCEPTIBLE
474	Larus glaucescens	3	2	0.666667	SUSCEPTIBLE
475	Larus leucophthalmus	2	2	1	SUSCEPTIBLE
476	Larus marinus	8	4	0.5	SUSCEPTIBLE
477	Larus melanocephalus	1	0	0	INSUFFICIENT DATA
478	Larus michahellis	9	3	0.333333	SUSCEPTIBLE
479	Larus modestus	2	2	1	SUSCEPTIBLE
480	Larus ridibundus	10	1	0.1	SUSCEPTIBLE
481	Saundersilarus saundersi	1	1	1	SUSCEPTIBLE
482	Larus thayeri	2	2	1	SUSCEPTIBLE
483	Leptoptilos crumeniferus	2	1	0.5	SUSCEPTIBLE
484	Leptoptilos javanicus	2	2	1	SUSCEPTIBLE
485	Leptotila jamaicensis	2	2	1	SUSCEPTIBLE
486	Leptotila plumbeiceps	2	2	1	SUSCEPTIBLE
487	Leptotila verreauxi	3	2	0.666667	SUSCEPTIBLE
488	Leucopsar rothschildi	1	0	0	INSUFFICIENT DATA
489	Limnothlypis swainsonii	2	0	0	INSUFFICIENT DATA
490	Limosa fedoa	2	0	0	INSUFFICIENT DATA
491	Limosa limosa	1	0	0	INSUFFICIENT DATA
492	Locustella luscinioides	4	4	1	SUSCEPTIBLE
493	Locustella naevia	1	0	0	INSUFFICIENT DATA
494	Lonchura punctulata	13	8	0.615385	SUSCEPTIBLE
495	Lophodytes cucullatus	2	2	1	SUSCEPTIBLE
496	Lophophorus impejanus	3	3	1	SUSCEPTIBLE
497	Lophophorus lhuysii	2	2	1	SUSCEPTIBLE
498	Lophospingus pusillus	1	0	0	INSUFFICIENT DATA
499	Lophura bulweri	2	2	1	SUSCEPTIBLE
500	Lophura erythrophthalma	1	0	0	INSUFFICIENT DATA
501	Lophura nycthemera	1	0	0	INSUFFICIENT DATA
502	Lorius domicella	1	0	0	INSUFFICIENT DATA
503	Lorius hypoinochrous	1	0	0	INSUFFICIENT DATA
504	Lorius lory	3	2	0.666667	SUSCEPTIBLE
505	Loxia curvirostra	2	1	0.5	SUSCEPTIBLE
506	Pyrrhulagra violacea	1	1	1	SUSCEPTIBLE
507	Luscinia luscinia	3	0	0	INSUFFICIENT DATA
508	Luscinia megarhynchos	9	3	0.333333	SUSCEPTIBLE
509	Cyanecula svecica	1	0	0	INSUFFICIENT DATA
510	Lymnocryptes minimus	1	0	0	INSUFFICIENT DATA
511	Machetornis rixosa	1	0	0	INSUFFICIENT DATA
512	Manacus candei	1	1	1	SUSCEPTIBLE
513	Marmaronetta angustirostris	3	0	0	INSUFFICIENT DATA
514	Megaceryle alcyon	6	3	0.5	SUSCEPTIBLE
515	Megaceryle torquata	1	0	0	INSUFFICIENT DATA
516	Megascops asio	10	3	0.3	SUSCEPTIBLE
517	Megascops choliba	1	0	0	INSUFFICIENT DATA
518	Megascops kennicottii	5	3	0.6	SUSCEPTIBLE
519	Melanerpes aurifrons	2	2	1	SUSCEPTIBLE
520	Melanerpes carolinus	12	6	0.5	SUSCEPTIBLE
521	Melanerpes erythrocephalus	9	3	0.333333	SUSCEPTIBLE
522	Melanerpes formicivorus	7	4	0.571429	SUSCEPTIBLE
523	Melanerpes lewis	2	2	1	SUSCEPTIBLE
524	Melanerpes pygmaeus	1	1	1	SUSCEPTIBLE
525	Melanerpes uropygialis	2	2	1	SUSCEPTIBLE
526	Melanitta fusca	2	0	0	INSUFFICIENT DATA
527	Melanoptila glabrirostris	1	0	0	INSUFFICIENT DATA
528	Meleagris gallopavo	22	18	0.818182	SUSCEPTIBLE
529	Meleagris ocellata	1	1	1	SUSCEPTIBLE
530	Melopsittacus undulatus	5	2	0.4	SUSCEPTIBLE
531	Melospiza georgiana	4	2	0.5	SUSCEPTIBLE
532	Melospiza lincolnii	13	3	0.230769	SUSCEPTIBLE
533	Melospiza melodia	41	16	0.390244	SUSCEPTIBLE
534	Mergellus albellus	2	2	1	SUSCEPTIBLE
535	Mergus merganser	3	2	0.666667	SUSCEPTIBLE
536	Mergus serrator	3	2	0.666667	SUSCEPTIBLE
537	Merops albicollis	1	1	1	SUSCEPTIBLE
538	Merops apiaster	6	0	0	INSUFFICIENT DATA
539	Merops persicus	1	0	0	INSUFFICIENT DATA
540	Merops pusillus	1	0	0	INSUFFICIENT DATA
541	Mesophoyx intermedia	1	0	0	INSUFFICIENT DATA
542	Mesopicos goertae	1	0	0	INSUFFICIENT DATA
543	Micrastur semitorquatus	1	0	0	INSUFFICIENT DATA
544	Micrathene whitneyi	3	3	1	SUSCEPTIBLE
545	Emberiza calandra	1	1	1	SUSCEPTIBLE
546	Phalcoboenus chimango	1	0	0	INSUFFICIENT DATA
547	Milvus migrans	6	2	0.333333	SUSCEPTIBLE
548	Milvus milvus	2	1	0.5	SUSCEPTIBLE
549	Mimus gilvus	6	4	0.666667	SUSCEPTIBLE
550	Mimus polyglottos	48	28	0.583333	SUSCEPTIBLE
551	Mimus triurus	1	0	0	INSUFFICIENT DATA
552	Mniotilta varia	5	3	0.6	SUSCEPTIBLE
553	Molothrus aeneus	1	1	1	SUSCEPTIBLE
554	Molothrus ater	48	25	0.520833	SUSCEPTIBLE
555	Molothrus bonariensis	1	0	0	INSUFFICIENT DATA
556	Molothrus rufoaxillaris	1	0	0	INSUFFICIENT DATA
557	Momotus momota	2	1	0.5	SUSCEPTIBLE
558	Motacilla alba	2	0	0	INSUFFICIENT DATA
559	Motacilla flava	4	1	0.25	SUSCEPTIBLE
560	Muscicapa striata	6	0	0	INSUFFICIENT DATA
561	Musophaga rossae	6	4	0.666667	SUSCEPTIBLE
562	Mycteria americana	1	0	0	INSUFFICIENT DATA
563	Myiarchus cinerascens	5	1	0.2	SUSCEPTIBLE
564	Myiarchus crinitus	9	5	0.555556	SUSCEPTIBLE
565	Myiarchus tuberculifer	3	2	0.666667	SUSCEPTIBLE
566	Myiarchus tyrannulus	7	3	0.428571	SUSCEPTIBLE
567	Myiopagis cotta	1	1	1	SUSCEPTIBLE
568	Myiopsitta monachus	2	0	0	INSUFFICIENT DATA
569	Myiozetetes similis	3	3	1	SUSCEPTIBLE
570	Neochen jubata	1	0	0	INSUFFICIENT DATA
571	Neophron percnopterus	1	1	1	SUSCEPTIBLE
572	Nesoenas mayeri	2	2	1	SUSCEPTIBLE
573	Nestor notabilis	2	2	1	SUSCEPTIBLE
574	Netta peposaca	2	2	1	SUSCEPTIBLE
575	Netta rufina	1	0	0	INSUFFICIENT DATA
576	Ninox scutulata	1	0	0	INSUFFICIENT DATA
577	Nucifraga columbiana	2	2	1	SUSCEPTIBLE
578	Numenius phaeopus	1	0	0	INSUFFICIENT DATA
579	Numida meleagris	4	1	0.25	SUSCEPTIBLE
580	Nyctanassa violacea	2	2	1	SUSCEPTIBLE
581	Nycticorax nycticorax	10	6	0.6	SUSCEPTIBLE
582	Nymphicus hollandicus	8	3	0.375	SUSCEPTIBLE
583	Nystalus maculatus	1	0	0	INSUFFICIENT DATA
584	Oena capensis	2	2	1	SUSCEPTIBLE
585	Oenanthe oenanthe	1	0	0	INSUFFICIENT DATA
586	Opisthocomus hoazin	1	0	0	INSUFFICIENT DATA
587	Oporornis agilis	1	0	0	INSUFFICIENT DATA
588	Geothlypis formosa	5	3	0.6	SUSCEPTIBLE
589	Geothlypis philadelphia	3	0	0	INSUFFICIENT DATA
590	Geothlypis tolmiei	7	2	0.285714	SUSCEPTIBLE
591	Oreortyx pictus	1	1	1	SUSCEPTIBLE
592	Oreoscoptes montanus	1	0	0	INSUFFICIENT DATA
593	Oriolus chinensis	1	0	0	INSUFFICIENT DATA
594	Oriolus oriolus	2	0	0	INSUFFICIENT DATA
595	Ortalis vetula	2	2	1	SUSCEPTIBLE
596	Otidiphaps nobilis	1	0	0	INSUFFICIENT DATA
597	Otis tarda	1	0	0	INSUFFICIENT DATA
598	Psiloscops flammeolus	4	4	1	SUSCEPTIBLE
599	Otus lempiji	1	0	0	INSUFFICIENT DATA
600	Otus scops	8	3	0.375	SUSCEPTIBLE
601	Oxyura jamaicensis	4	3	0.75	SUSCEPTIBLE
602	Pachyramphus aglaiae	1	0	0	INSUFFICIENT DATA
603	Lonchura oryzivora	1	0	0	INSUFFICIENT DATA
604	Pandion haliaetus	17	7	0.411765	SUSCEPTIBLE
605	Panurus biarmicus	2	0	0	INSUFFICIENT DATA
606	Parabuteo unicinctus	9	5	0.555556	SUSCEPTIBLE
607	Paradisaea rubra	1	0	0	INSUFFICIENT DATA
608	Sinosuthora webbiana	1	0	0	INSUFFICIENT DATA
609	Paroaria coronata	2	1	0.5	SUSCEPTIBLE
610	Setophaga americana	4	4	1	SUSCEPTIBLE
611	Periparus ater	1	0	0	INSUFFICIENT DATA
612	Poecile atricapillus	8	3	0.375	SUSCEPTIBLE
613	Cyanistes caeruleus	3	1	0.333333	SUSCEPTIBLE
614	Poecile carolinensis	5	3	0.6	SUSCEPTIBLE
615	Lophophanes cristatus	1	0	0	INSUFFICIENT DATA
616	Poecile gambeli	2	2	1	SUSCEPTIBLE
617	Parus major	10	4	0.4	SUSCEPTIBLE
618	Poecile montanus	1	0	0	INSUFFICIENT DATA
619	Poecile palustris	1	0	0	INSUFFICIENT DATA
620	Poecile rufescens	1	1	1	SUSCEPTIBLE
621	Parus varius	2	2	1	SUSCEPTIBLE
622	Passer domesticus	99	70	0.707071	SUSCEPTIBLE
623	Passer hispaniolensis	1	0	0	INSUFFICIENT DATA
624	Passer italiae	1	0	0	INSUFFICIENT DATA
625	Passer montanus	9	2	0.222222	SUSCEPTIBLE
626	Passerculus sandwichensis	11	2	0.181818	SUSCEPTIBLE
627	Passerella iliaca	9	4	0.444444	SUSCEPTIBLE
628	Passerina amoena	5	1	0.2	SUSCEPTIBLE
629	Passerina caerulea	13	2	0.153846	SUSCEPTIBLE
630	Passerina ciris	5	1	0.2	SUSCEPTIBLE
631	Passerina cyanea	23	12	0.521739	SUSCEPTIBLE
632	Patagioenas cayennensis	1	1	1	SUSCEPTIBLE
633	Patagioenas fasciata	3	3	1	SUSCEPTIBLE
634	Patagioenas inornata	1	1	1	SUSCEPTIBLE
635	Patagioenas leucocephala	4	2	0.5	SUSCEPTIBLE
636	Patagioenas maculosa	1	0	0	INSUFFICIENT DATA
637	Pavo cristatus	9	5	0.555556	SUSCEPTIBLE
638	Pavo muticus	1	1	1	SUSCEPTIBLE
639	Pelecanus erythrorhynchos	15	14	0.933333	SUSCEPTIBLE
640	Pelecanus occidentalis	3	3	1	SUSCEPTIBLE
641	Penelope perspicax	1	0	0	INSUFFICIENT DATA
642	Penelope purpurascens	1	1	1	SUSCEPTIBLE
643	Perdix perdix	5	1	0.2	SUSCEPTIBLE
644	Pernis apivorus	5	1	0.2	SUSCEPTIBLE
645	Petrochelidon fulva	3	1	0.333333	SUSCEPTIBLE
646	Petrochelidon pyrrhonota	8	5	0.625	SUSCEPTIBLE
647	Phaenicophilus palmarum	1	1	1	SUSCEPTIBLE
648	Phaethon lepturus	4	0	0	INSUFFICIENT DATA
649	Phaethon rubricauda	1	0	0	INSUFFICIENT DATA
650	Phalacrocorax auritus	11	7	0.636364	SUSCEPTIBLE
651	Phalacrocorax bougainvilliorum	4	4	1	SUSCEPTIBLE
652	Phalacrocorax carbo	9	6	0.666667	SUSCEPTIBLE
653	Phalacrocorax pelagicus	2	1	0.5	SUSCEPTIBLE
654	Phalaenoptilus nuttallii	3	0	0	INSUFFICIENT DATA
655	Phalaropus lobatus	1	0	0	INSUFFICIENT DATA
656	Pharomachrus auriceps	1	0	0	INSUFFICIENT DATA
657	Phasianus colchicus	18	9	0.5	SUSCEPTIBLE
658	Pheucticus ludovicianus	14	8	0.571429	SUSCEPTIBLE
659	Pheucticus melanocephalus	24	10	0.416667	SUSCEPTIBLE
660	Philomachus pugnax	1	0	0	INSUFFICIENT DATA
661	Phoenicopterus chilensis	4	4	1	SUSCEPTIBLE
662	Phoenicopterus roseus	2	0	0	INSUFFICIENT DATA
663	Phoenicopterus ruber	6	6	1	SUSCEPTIBLE
664	Phoenicurus ochruros	5	1	0.2	SUSCEPTIBLE
665	Phoenicurus phoenicurus	9	5	0.555556	SUSCEPTIBLE
666	Phylloscopus collybita	4	0	0	INSUFFICIENT DATA
667	Phylloscopus sibilatrix	4	1	0.25	SUSCEPTIBLE
668	Phylloscopus trochilus	10	3	0.3	SUSCEPTIBLE
669	Phytotoma rutila	1	0	0	INSUFFICIENT DATA
670	Pica hudsonia	10	6	0.6	SUSCEPTIBLE
671	Pica nutalli	6	6	1	SUSCEPTIBLE
672	Pica pica	40	23	0.575	SUSCEPTIBLE
673	Dryobates nuttallii	4	3	0.75	SUSCEPTIBLE
674	Dryobates pubescens	16	4	0.25	SUSCEPTIBLE
675	Dryobates scalaris	1	0	0	INSUFFICIENT DATA
676	Leuconotopicus villosus	5	3	0.6	SUSCEPTIBLE
677	Picus viridis	11	2	0.181818	SUSCEPTIBLE
678	Pionus chalcopterus	1	0	0	INSUFFICIENT DATA
679	Pionus menstruus	1	0	0	INSUFFICIENT DATA
680	Pionus senilis	1	1	1	SUSCEPTIBLE
681	Pipilo chlorurus	1	0	0	INSUFFICIENT DATA
682	Melozone crissalis	23	13	0.565217	SUSCEPTIBLE
683	Pipilo erythrophthalmus	17	8	0.470588	SUSCEPTIBLE
684	Pipilo maculatus	14	4	0.285714	SUSCEPTIBLE
685	Pipraeidea bonariensis	1	0	0	INSUFFICIENT DATA
686	Piranga ludoviciana	16	7	0.4375	SUSCEPTIBLE
687	Piranga olivacea	6	4	0.666667	SUSCEPTIBLE
688	Piranga rubra	8	4	0.5	SUSCEPTIBLE
689	Pitangus sulphuratus	6	6	1	SUSCEPTIBLE
690	Platalea leucorodia	1	0	0	INSUFFICIENT DATA
691	Platycercus adscitus	1	1	1	SUSCEPTIBLE
692	Platycercus elegans	3	3	1	SUSCEPTIBLE
693	Plegadis chihi	1	1	1	SUSCEPTIBLE
694	Plegadis falcinellus	2	1	0.5	SUSCEPTIBLE
695	Plocepasser mahali	1	1	1	SUSCEPTIBLE
696	Ploceus cucullatus	2	2	1	SUSCEPTIBLE
697	Ploceus intermedius	1	1	1	SUSCEPTIBLE
698	Ploceus luteolus	1	0	0	INSUFFICIENT DATA
699	Ploceus melanocephalus	1	0	0	INSUFFICIENT DATA
700	Ploceus subaureus	1	1	1	SUSCEPTIBLE
701	Ploceus velatus	1	1	1	SUSCEPTIBLE
702	Pluvialis apricaria	1	0	0	INSUFFICIENT DATA
703	Pluvialis fulva	1	0	0	INSUFFICIENT DATA
704	Pluvialis squatarola	1	0	0	INSUFFICIENT DATA
705	Podiceps cristatus	2	0	0	INSUFFICIENT DATA
706	Podilymbus podiceps	2	2	1	SUSCEPTIBLE
707	Polioptila albiloris	2	2	1	SUSCEPTIBLE
708	Polioptila caerulea	1	0	0	INSUFFICIENT DATA
709	Polioptila melanura	1	0	0	INSUFFICIENT DATA
710	Polyplectron inopinatum	2	2	1	SUSCEPTIBLE
711	Polyplectron malacense	1	0	0	INSUFFICIENT DATA
712	Poospiza nigrorufa	1	0	0	INSUFFICIENT DATA
713	Poospiza ornata	1	0	0	INSUFFICIENT DATA
714	Porphyrio martinicus	2	2	1	SUSCEPTIBLE
715	Porzana carolina	3	2	0.666667	SUSCEPTIBLE
716	Priotelus roseigaster	1	0	0	INSUFFICIENT DATA
717	Progne subis	6	2	0.333333	SUSCEPTIBLE
718	Protonotaria citrea	5	3	0.6	SUSCEPTIBLE
719	Prunella modularis	6	3	0.5	SUSCEPTIBLE
720	Psaltriparus minimus	4	1	0.25	SUSCEPTIBLE
721	Pseudeos fuscata	2	2	1	SUSCEPTIBLE
722	Pseudocolopteryx acutipennis	1	0	0	INSUFFICIENT DATA
723	Pseudoseisura lophotes	1	0	0	INSUFFICIENT DATA
724	Psittacus erithacus	4	2	0.5	SUSCEPTIBLE
725	Psitteuteles iris	1	0	0	INSUFFICIENT DATA
726	Pterocles decoratus	1	0	0	INSUFFICIENT DATA
727	Pteroglossus aracari	2	0	0	INSUFFICIENT DATA
728	Ptilinopus porphyreus	1	0	0	INSUFFICIENT DATA
729	Ardenna pacifica	3	0	0	INSUFFICIENT DATA
730	Puffinus puffinus	1	0	0	INSUFFICIENT DATA
731	Pycnonotus barbatus	1	0	0	INSUFFICIENT DATA
732	Pycnonotus capensis	1	0	0	INSUFFICIENT DATA
733	Pyrocephalus rubinus	2	1	0.5	SUSCEPTIBLE
734	Pyrrhocorax pyrrhocorax	1	0	0	INSUFFICIENT DATA
735	Pyrrhula pyrrhula	3	0	0	INSUFFICIENT DATA
736	Pyrrhura molinae	1	0	0	INSUFFICIENT DATA
737	Quelea quelea	1	1	1	SUSCEPTIBLE
738	Quiscalus major	5	4	0.8	SUSCEPTIBLE
739	Quiscalus mexicanus	12	9	0.75	SUSCEPTIBLE
740	Quiscalus quiscula	38	21	0.552632	SUSCEPTIBLE
741	Rallus aquaticus	2	0	0	INSUFFICIENT DATA
742	Rallus limicola	4	4	1	SUSCEPTIBLE
743	Rallus longirostris	2	2	1	SUSCEPTIBLE
744	Ramphastos sulfuratus	2	0	0	INSUFFICIENT DATA
745	Recurvirostra avosetta	1	0	0	INSUFFICIENT DATA
746	Regulus calendula	6	0	0	INSUFFICIENT DATA
747	Regulus ignicapilla	1	0	0	INSUFFICIENT DATA
748	Regulus regulus	2	0	0	INSUFFICIENT DATA
749	Regulus satrapa	3	0	0	INSUFFICIENT DATA
750	Remiz pendulinus	1	1	1	SUSCEPTIBLE
751	Rhynchopsitta pachyrhyncha	2	2	1	SUSCEPTIBLE
752	Rhynchospiza strigiceps	1	0	0	INSUFFICIENT DATA
753	Riparia riparia	9	3	0.333333	SUSCEPTIBLE
754	Rissa tridactyla	1	0	0	INSUFFICIENT DATA
755	Rollulus rouloul	2	2	1	SUSCEPTIBLE
756	Rostratula benghalensis	1	0	0	INSUFFICIENT DATA
757	Rynchops niger	3	3	1	SUSCEPTIBLE
758	Saltator atriceps	1	1	1	SUSCEPTIBLE
759	Saltator aurantiirostris	1	0	0	INSUFFICIENT DATA
760	Saltator coerulescens	2	2	1	SUSCEPTIBLE
761	Sarcoramphus papa	3	2	0.666667	SUSCEPTIBLE
762	Saxicola rubetra	1	0	0	INSUFFICIENT DATA
763	Saxicola torquatus	1	0	0	INSUFFICIENT DATA
764	Sayornis nigricans	16	5	0.3125	SUSCEPTIBLE
765	Sayornis phoebe	13	5	0.384615	SUSCEPTIBLE
766	Scolopax minor	1	0	0	INSUFFICIENT DATA
767	Scolopax rusticola	4	0	0	INSUFFICIENT DATA
768	Seiurus aurocapilla	16	9	0.5625	SUSCEPTIBLE
769	Parkesia motacilla	2	0	0	INSUFFICIENT DATA
770	Parkesia noveboracensis	19	12	0.631579	SUSCEPTIBLE
771	Selasphorus platycercus	1	0	0	INSUFFICIENT DATA
772	Selasphorus rufus	5	4	0.8	SUSCEPTIBLE
773	Selasphorus sasin	1	0	0	INSUFFICIENT DATA
774	Serinus canaria	4	3	0.75	SUSCEPTIBLE
775	Serinus serinus	2	0	0	INSUFFICIENT DATA
776	Serpophaga subcristata	1	0	0	INSUFFICIENT DATA
777	Setophaga ruticilla	5	2	0.4	SUSCEPTIBLE
778	Sialia currucoides	2	2	1	SUSCEPTIBLE
779	Sialia mexicana	9	6	0.666667	SUSCEPTIBLE
780	Sialia sialis	12	7	0.583333	SUSCEPTIBLE
781	Sicalis flaveola	2	0	0	INSUFFICIENT DATA
782	Sicalis luteola	1	0	0	INSUFFICIENT DATA
783	Sitta canadensis	3	1	0.333333	SUSCEPTIBLE
784	Sitta carolinensis	9	5	0.555556	SUSCEPTIBLE
785	Sitta europaea	2	1	0.5	SUSCEPTIBLE
786	Sitta pusilla	1	0	0	INSUFFICIENT DATA
787	Sitta pygmaea	2	2	1	SUSCEPTIBLE
788	Somateria mollissima	1	0	0	INSUFFICIENT DATA
789	Speculanas specularis	3	3	1	SUSCEPTIBLE
790	Spheniscus demersus	2	2	1	SUSCEPTIBLE
791	Spheniscus humboldti	2	2	1	SUSCEPTIBLE
792	Spheniscus magellanicus	2	2	1	SUSCEPTIBLE
793	Sphyrapicus nuchalis	1	1	1	SUSCEPTIBLE
794	Sphyrapicus ruber	3	2	0.666667	SUSCEPTIBLE
795	Sphyrapicus varius	6	2	0.333333	SUSCEPTIBLE
796	Spiza americana	3	2	0.666667	SUSCEPTIBLE
797	Spizaetus melanoleucus	1	0	0	INSUFFICIENT DATA
798	Spizaetus ornatus	1	0	0	INSUFFICIENT DATA
799	Spizaetus tyrannus	1	0	0	INSUFFICIENT DATA
800	Passerella arborea	3	2	0.666667	SUSCEPTIBLE
801	Spizella atrogularis	2	2	1	SUSCEPTIBLE
802	Spizella breweri	1	0	0	INSUFFICIENT DATA
803	Spizella pallida	4	2	0.5	SUSCEPTIBLE
804	Spizella passerina	11	2	0.181818	SUSCEPTIBLE
805	Spizella pusilla	11	3	0.272727	SUSCEPTIBLE
806	Sporophila caerulescens	1	0	0	INSUFFICIENT DATA
807	Sporophila torqueola	2	2	1	SUSCEPTIBLE
808	Stelgidopteryx serripennis	4	1	0.25	SUSCEPTIBLE
809	Stellula calliope	1	0	0	INSUFFICIENT DATA
810	Stercorarius pomarinus	1	0	0	INSUFFICIENT DATA
811	Sterna albifrons	1	0	0	INSUFFICIENT DATA
812	Sterna antillarum	1	1	1	SUSCEPTIBLE
813	Sterna caspia	1	1	1	SUSCEPTIBLE
814	Onychoprion fuscatus	4	0	0	INSUFFICIENT DATA
815	Sterna hirundo	6	1	0.166667	SUSCEPTIBLE
816	Sterna nilotica	1	0	0	INSUFFICIENT DATA
817	Stigmatopelia chinensis	2	0	0	INSUFFICIENT DATA
818	Stigmatopelia senegalensis	3	2	0.666667	SUSCEPTIBLE
819	Streptopelia capicola	1	1	1	SUSCEPTIBLE
820	Streptopelia decaocto	13	4	0.307692	SUSCEPTIBLE
821	Streptopelia decipiens	1	1	1	SUSCEPTIBLE
822	Streptopelia orientalis	3	2	0.666667	SUSCEPTIBLE
823	Streptopelia risoria	1	1	1	SUSCEPTIBLE
824	Streptopelia turtur	9	5	0.555556	SUSCEPTIBLE
825	Streptopelia vinacea	1	1	1	SUSCEPTIBLE
826	Strix aluco	13	4	0.307692	SUSCEPTIBLE
827	Strix nebulosa	6	5	0.833333	SUSCEPTIBLE
828	Strix occidentalis	3	2	0.666667	SUSCEPTIBLE
829	Strix uralensis	1	0	0	INSUFFICIENT DATA
830	Strix varia	10	6	0.6	SUSCEPTIBLE
831	Struthio camelus	1	1	1	SUSCEPTIBLE
832	Sturnella magna	2	1	0.5	SUSCEPTIBLE
833	Sturnella neglecta	3	2	0.666667	SUSCEPTIBLE
834	Spodiopsar cineraceus	1	0	0	INSUFFICIENT DATA
835	Sturnus unicolor	1	0	0	INSUFFICIENT DATA
836	Sturnus vulgaris	66	22	0.333333	SUSCEPTIBLE
837	Sula dactylatra	1	0	0	INSUFFICIENT DATA
838	Sula sula	2	0	0	INSUFFICIENT DATA
839	Surnia ulula	3	3	1	SUSCEPTIBLE
840	Sylvia atricapilla	14	8	0.571429	SUSCEPTIBLE
841	Sylvia borin	7	3	0.428571	SUSCEPTIBLE
842	Sylvia cantillans	2	0	0	INSUFFICIENT DATA
843	Sylvia communis	10	4	0.4	SUSCEPTIBLE
844	Sylvia curruca	4	1	0.25	SUSCEPTIBLE
845	Sylvia hortensis	2	0	0	INSUFFICIENT DATA
846	Sylvia melanocephala	2	1	0.5	SUSCEPTIBLE
847	Sylvia nisoria	1	0	0	INSUFFICIENT DATA
848	Tachybaptus ruficollis	3	0	0	INSUFFICIENT DATA
849	Tachycineta bicolor	13	4	0.307692	SUSCEPTIBLE
850	Tachycineta thalassina	2	0	0	INSUFFICIENT DATA
851	Tachymarptis melba	1	0	0	INSUFFICIENT DATA
852	Tadorna ferruginea	1	0	0	INSUFFICIENT DATA
853	Taeniopygia guttata	4	3	0.75	SUSCEPTIBLE
854	Taraba major	1	0	0	INSUFFICIENT DATA
855	Terpsiphone viridis	1	0	0	INSUFFICIENT DATA
856	Tetrao urogallus	3	0	0	INSUFFICIENT DATA
857	Thamnophilus doliatus	1	1	1	SUSCEPTIBLE
858	Thraupis abbas	1	1	1	SUSCEPTIBLE
859	Thraupis episcopus	2	2	1	SUSCEPTIBLE
860	Tangara palmarum	3	3	1	SUSCEPTIBLE
861	Thryomanes bewickii	7	3	0.428571	SUSCEPTIBLE
862	Thryothorus ludovicianus	28	16	0.571429	SUSCEPTIBLE
863	Pheugopedius maculipectus	3	2	0.666667	SUSCEPTIBLE
864	Melanospiza bicolor	3	2	0.666667	SUSCEPTIBLE
865	Tiaris olivaceus	2	2	1	SUSCEPTIBLE
866	Tmetothylacus tenellus	1	1	1	SUSCEPTIBLE
867	Tockus erythrorhynchus	1	0	0	INSUFFICIENT DATA
868	Todiramphus cinnamominus	2	2	1	SUSCEPTIBLE
869	Tolmomyias sulphurescens	1	1	1	SUSCEPTIBLE
870	Toxostoma lecontei	1	1	1	SUSCEPTIBLE
871	Toxostoma longirostre	2	2	1	SUSCEPTIBLE
872	Toxostoma redivivum	5	4	0.8	SUSCEPTIBLE
873	Toxostoma rufum	22	13	0.590909	SUSCEPTIBLE
874	Tragopan blythii	4	4	1	SUSCEPTIBLE
875	Tragopan caboti	1	0	0	INSUFFICIENT DATA
876	Tragopan satyra	3	2	0.666667	SUSCEPTIBLE
877	Trichoglossus haematodus	3	2	0.666667	SUSCEPTIBLE
878	Trichoglossus moluccanus	1	0	0	INSUFFICIENT DATA
879	Tringa flavipes	1	0	0	INSUFFICIENT DATA
880	Tringa nebularia	1	0	0	INSUFFICIENT DATA
881	Tringa ochropus	1	0	0	INSUFFICIENT DATA
882	Tringa totanus	1	0	0	INSUFFICIENT DATA
883	Troglodytes aedon	15	7	0.466667	SUSCEPTIBLE
884	Troglodytes troglodytes	4	3	0.75	SUSCEPTIBLE
885	Trogon citreolus	1	1	1	SUSCEPTIBLE
886	Turdus amaurochalinus	1	0	0	INSUFFICIENT DATA
887	Turdus aurantius	1	1	1	SUSCEPTIBLE
888	Turdus grayi	12	8	0.666667	SUSCEPTIBLE
889	Turdus hortulorum	1	0	0	INSUFFICIENT DATA
890	Turdus iliacus	2	0	0	INSUFFICIENT DATA
891	Turdus jamaicensis	1	1	1	SUSCEPTIBLE
892	Turdus leucomelas	2	1	0.5	SUSCEPTIBLE
893	Turdus merula	25	7	0.28	SUSCEPTIBLE
894	Turdus migratorius	58	37	0.637931	SUSCEPTIBLE
895	Turdus philomelos	12	3	0.25	SUSCEPTIBLE
896	Turdus pilaris	2	0	0	INSUFFICIENT DATA
897	Turdus plumbeus	3	3	1	SUSCEPTIBLE
898	Turdus rufiventris	1	0	0	INSUFFICIENT DATA
899	Turtur abyssinicus	1	0	0	INSUFFICIENT DATA
900	Turtur chalcospilos	1	1	1	SUSCEPTIBLE
901	Tympanuchus cupido	2	2	1	SUSCEPTIBLE
902	Tyrannus caudifasciatus	1	1	1	SUSCEPTIBLE
903	Tyrannus forficatus	2	2	1	SUSCEPTIBLE
904	Tyrannus melancholicus	4	4	1	SUSCEPTIBLE
905	Tyrannus savana	1	0	0	INSUFFICIENT DATA
906	Tyrannus tyrannus	6	4	0.666667	SUSCEPTIBLE
907	Tyrannus verticalis	14	6	0.428571	SUSCEPTIBLE
908	Tyrannus vociferans	1	0	0	INSUFFICIENT DATA
909	Tyto alba	25	10	0.4	SUSCEPTIBLE
910	Upupa epops	6	2	0.333333	SUSCEPTIBLE
911	Uria aalge	3	1	0.333333	SUSCEPTIBLE
912	Urocolius macrourus	1	1	1	SUSCEPTIBLE
913	Vanellus chilensis	1	0	0	INSUFFICIENT DATA
914	Vanellus spinosus	2	1	0.5	SUSCEPTIBLE
915	Vanellus vanellus	2	1	0.5	SUSCEPTIBLE
916	Leiothlypis celata	15	4	0.266667	SUSCEPTIBLE
917	Vermivora chrysoptera	1	1	1	SUSCEPTIBLE
918	Leiothlypis peregrina	3	2	0.666667	SUSCEPTIBLE
919	Vermivora cyanoptera	1	0	0	INSUFFICIENT DATA
920	Leiothlypis ruficapilla	10	2	0.2	SUSCEPTIBLE
921	Vireo altiloquus	3	2	0.666667	SUSCEPTIBLE
922	Vireo caribaeus	1	0	0	INSUFFICIENT DATA
923	Vireo cassinii	1	0	0	INSUFFICIENT DATA
924	Vireo flavifrons	2	0	0	INSUFFICIENT DATA
925	Vireo flavoviridis	1	1	1	SUSCEPTIBLE
926	Vireo gilvus	8	4	0.5	SUSCEPTIBLE
927	Vireo griseus	9	2	0.222222	SUSCEPTIBLE
928	Vireo modestus	1	1	1	SUSCEPTIBLE
929	Vireo olivaceus	8	4	0.5	SUSCEPTIBLE
930	Vireo pallens	5	2	0.4	SUSCEPTIBLE
931	Vireo philadelphicus	1	0	0	INSUFFICIENT DATA
932	Vireo solitarius	2	0	0	INSUFFICIENT DATA
933	Volatinia jacarina	2	1	0.5	SUSCEPTIBLE
934	Cardenilla canadensis	5	4	0.8	SUSCEPTIBLE
935	Setophaga citrina	8	5	0.625	SUSCEPTIBLE
936	Cardenilla pusilla	19	7	0.368421	SUSCEPTIBLE
937	Xanthocephalus xanthocephalus	2	0	0	INSUFFICIENT DATA
938	Zenaida asiatica	5	3	0.6	SUSCEPTIBLE
939	Zenaida auriculata	1	0	0	INSUFFICIENT DATA
940	Zenaida aurita	2	2	1	SUSCEPTIBLE
941	Zenaida macroura	61	40	0.655738	SUSCEPTIBLE
942	Zonotrichia albicollis	10	5	0.5	SUSCEPTIBLE
943	Zonotrichia atricapilla	14	8	0.571429	SUSCEPTIBLE
944	Zonotrichia capensis	1	0	0	INSUFFICIENT DATA
945	Zonotrichia leucophrys	28	15	0.535714	SUSCEPTIBLE
946	Zonotrichia querula	1	0	0	INSUFFICIENT DATA
947	Zoothera dauma	1	0	0	INSUFFICIENT DATA
948	Ixoreus naevius	2	2	1	SUSCEPTIBLE
949	Zosterops japonicus	1	0	0	INSUFFICIENT DATA
